# Supplementary material
Source: PubMed Central journal article supplement (PMC5812911)
Supplement: mmc1.pdf [file mmc1.pdf]

**The American Journal of Human Genetics, Volume 101**

**Supplemental Data**

**A Powerful Approach to Estimating  
Annotation-Stratified Genetic Covariance  
via GWAS Summary Statistics**

**Qiongshi Lu, Boyang Li, Derek Ou, Margret Erlendsdottir, Ryan L. Powles, Tony Jiang, Yiming Hu, David Chang, Chentian Jin, Wei Dai, Qidu He, Zefeng Liu, Shubhabrata Mukherjee, Paul K. Crane, and Hongyu Zhao**

## Supplementary Figures

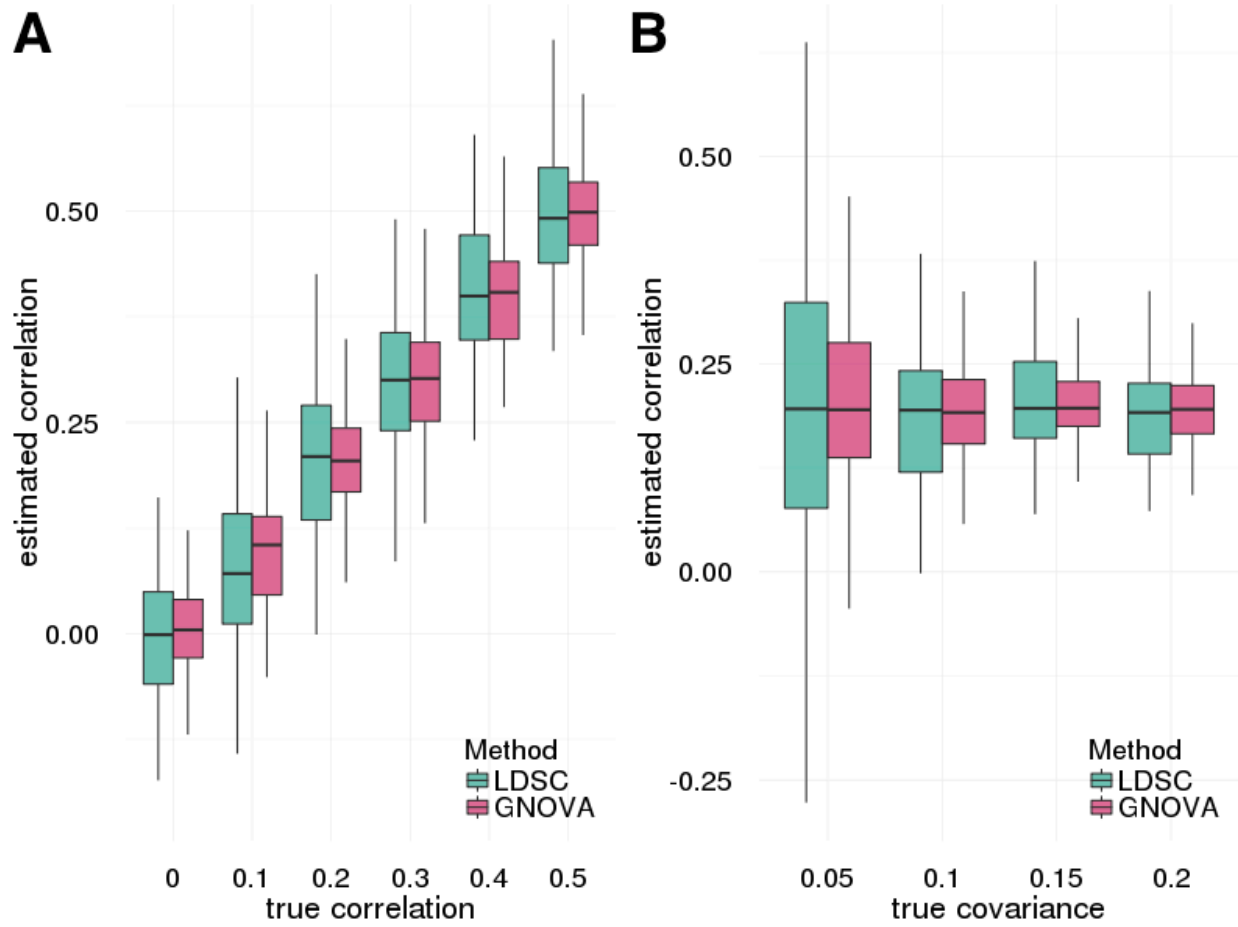

**Figure S1. Compare genetic correlation estimates through numerical simulations.** See Methods section for details of the simulation settings. **(A)** Simulation setting 1: fixed heritability to be 0.5 for both traits; varied genetic correlation from 0 to 0.5. **(B)** Simulation setting 2: fixed genetic correlation to be 0.2; varied genetic covariance from 0.05 to 0.2.

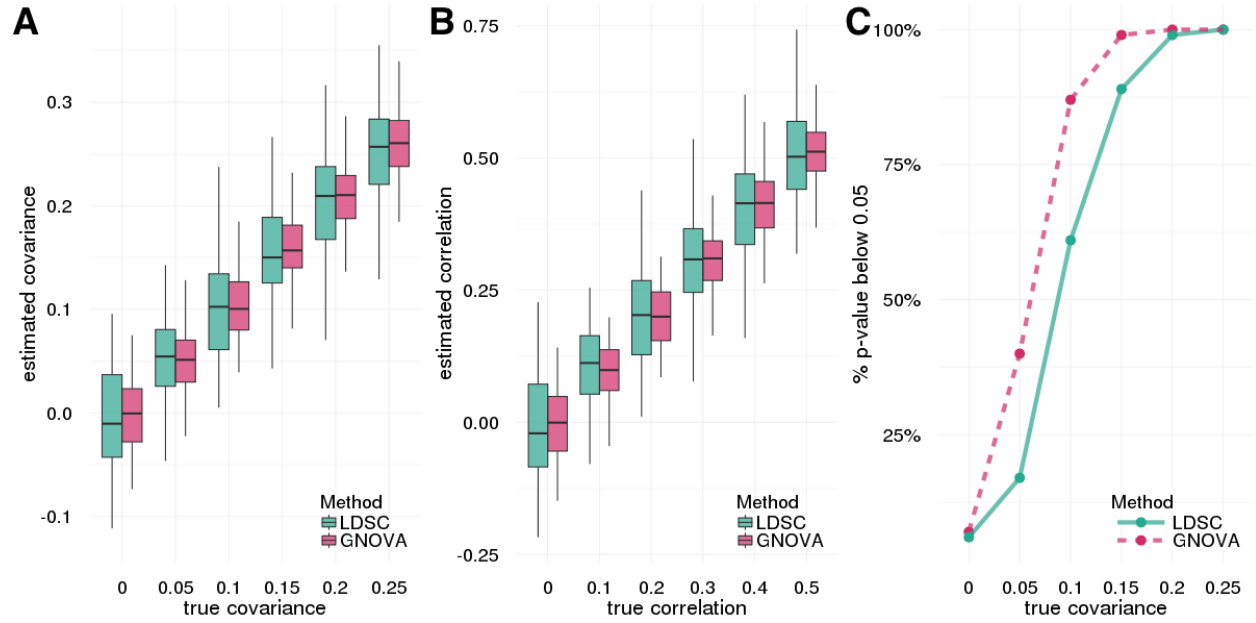

**Figure S2. Compare GNOVA and LDSC using two traits simulated on the same cohort.** Sample overlap correction was applied when estimating genetic covariance. See simulation setting 3 in the **Methods** section for details on the analysis. Panels (A-C) show the genetic covariance estimates, genetic correlation estimates, and power calculation, respectively.

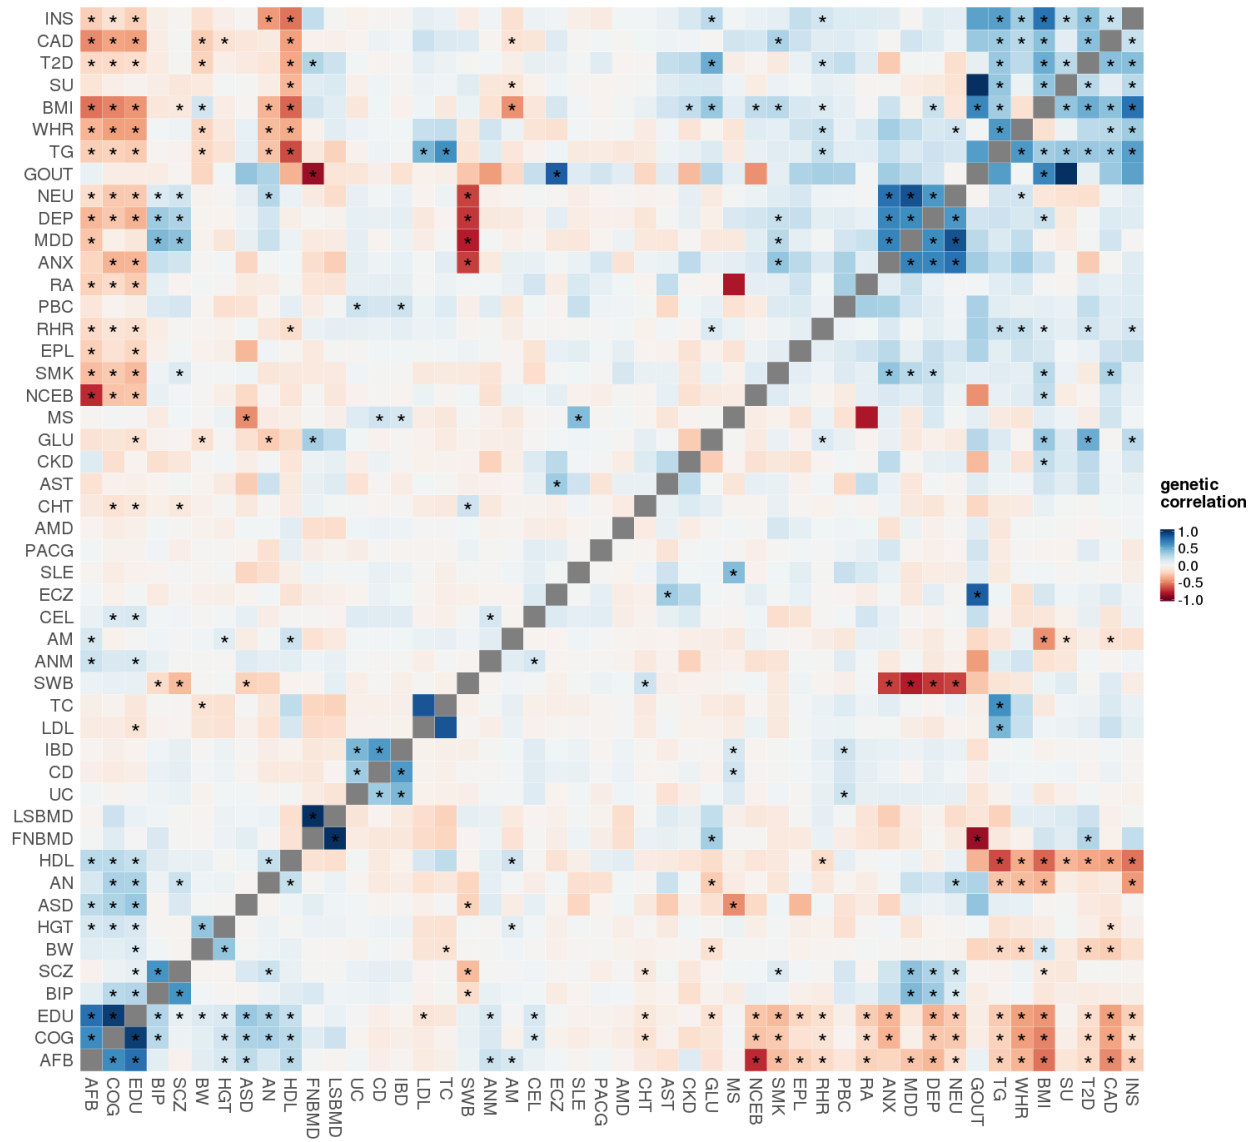

**Figure S3. Genetic correlations of 48 complex traits estimated GNOVA.** Asterisks highlight significant genetic correlations after Bonferroni correction ( $p < 4.4 \times 10^{-5}$ ). The order of traits is determined by hierarchical clustering. Sample overlap correction was applied to trait pairs with substantial sample sharing (**Figure S8**). Correlation estimates above 1 or below -1 were truncated.

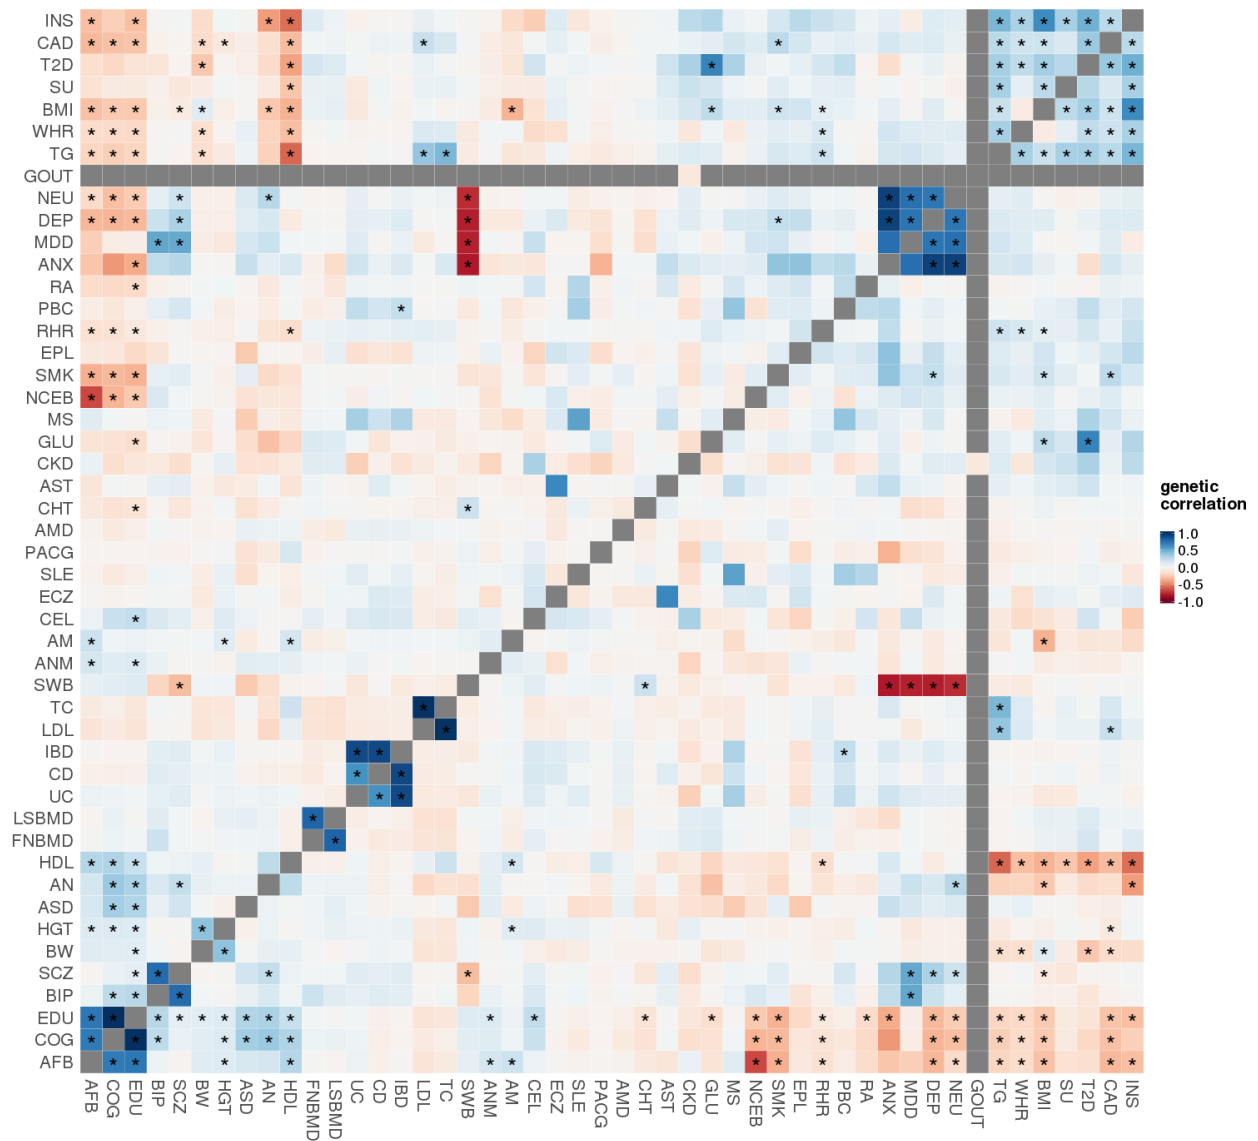

**Figure S4. Genetic correlations of 48 complex traits estimated by LDSC.** Asterisks highlight significant genetic correlations after Bonferroni correction ( $p < 4.4 \times 10^{-5}$ ). The order of traits is the same as shown in **Figure S3**. LDSC output p-value=NA for most pairs that involve gout due to its negative heritability estimate. Those blocks are colored in grey.

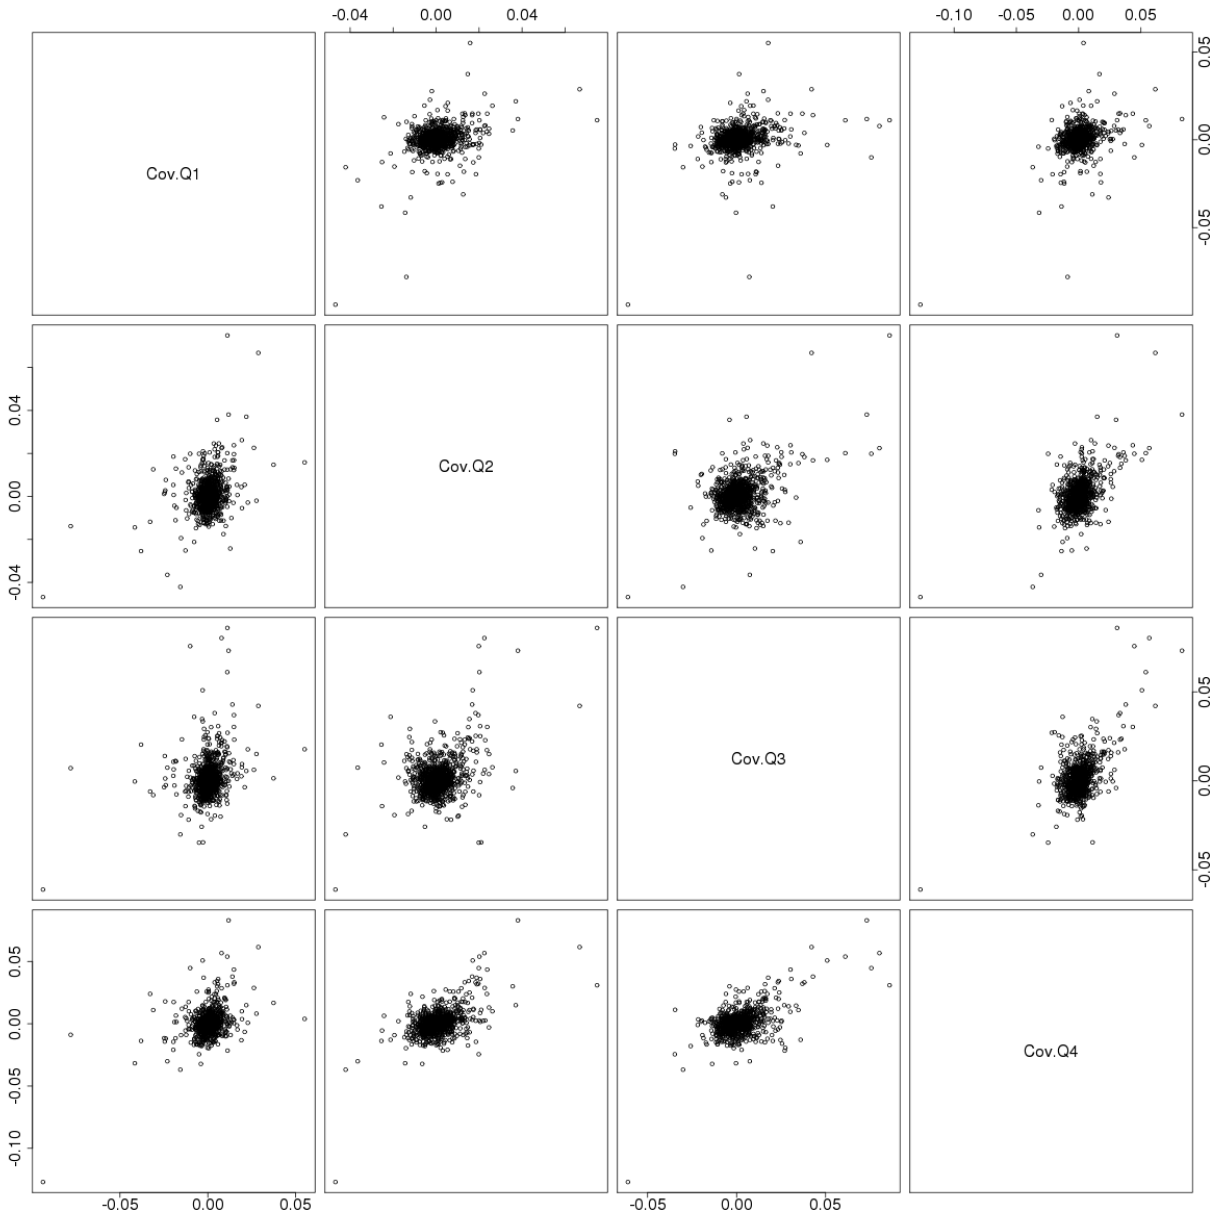

**Figure S5. Scatter plot matrix for MAF-stratified genetic covariance estimates.** Q1, Q2, Q3, and Q4 denote the MAF quarters (from lowest to highest).

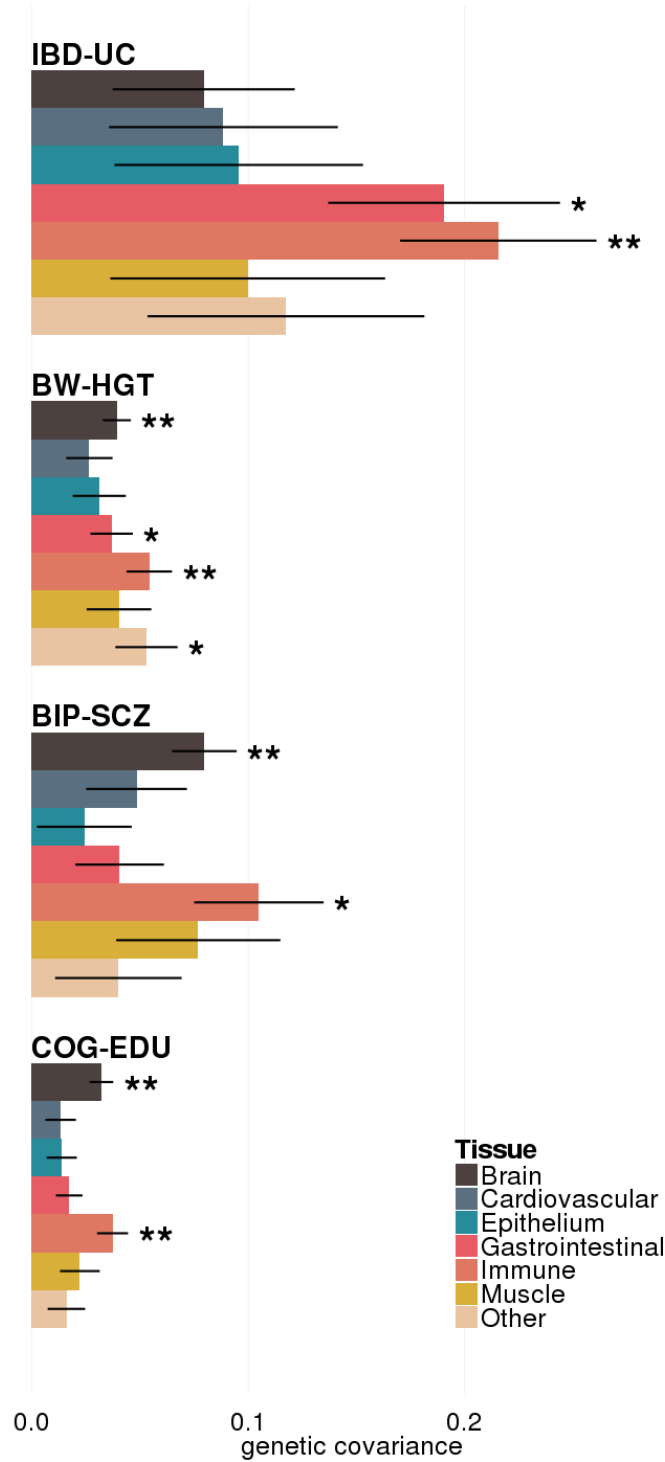

**Figure S6. Stratify genetic covariance by tissue type.** Intervals show the standard error of covariance estimates. Single asterisks indicate p-values below  $0.05/(4 \times 7) = 0.0018$ . Double asterisks indicate p-values below  $0.05/(7 \times 1225) = 5.8 \times 10^{-6}$ .

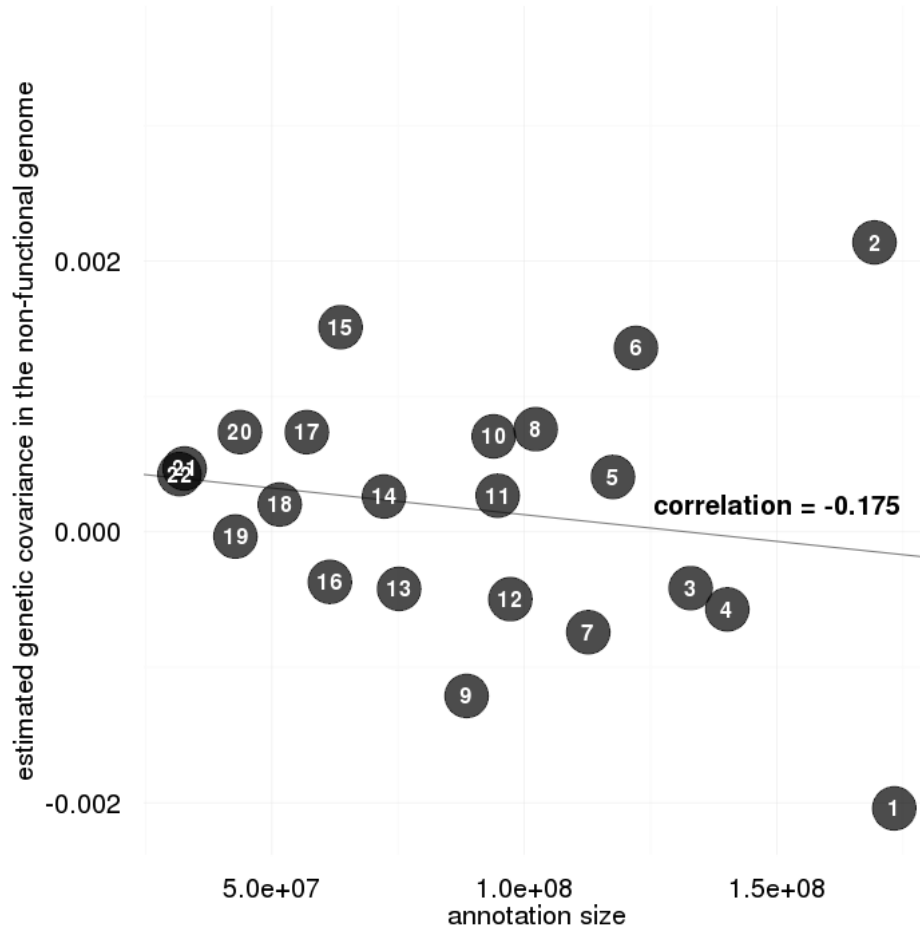

**Figure S7. Compare the estimated genetic covariance in the predicted non-functional genome on each chromosome with size of the non-functional genome.**



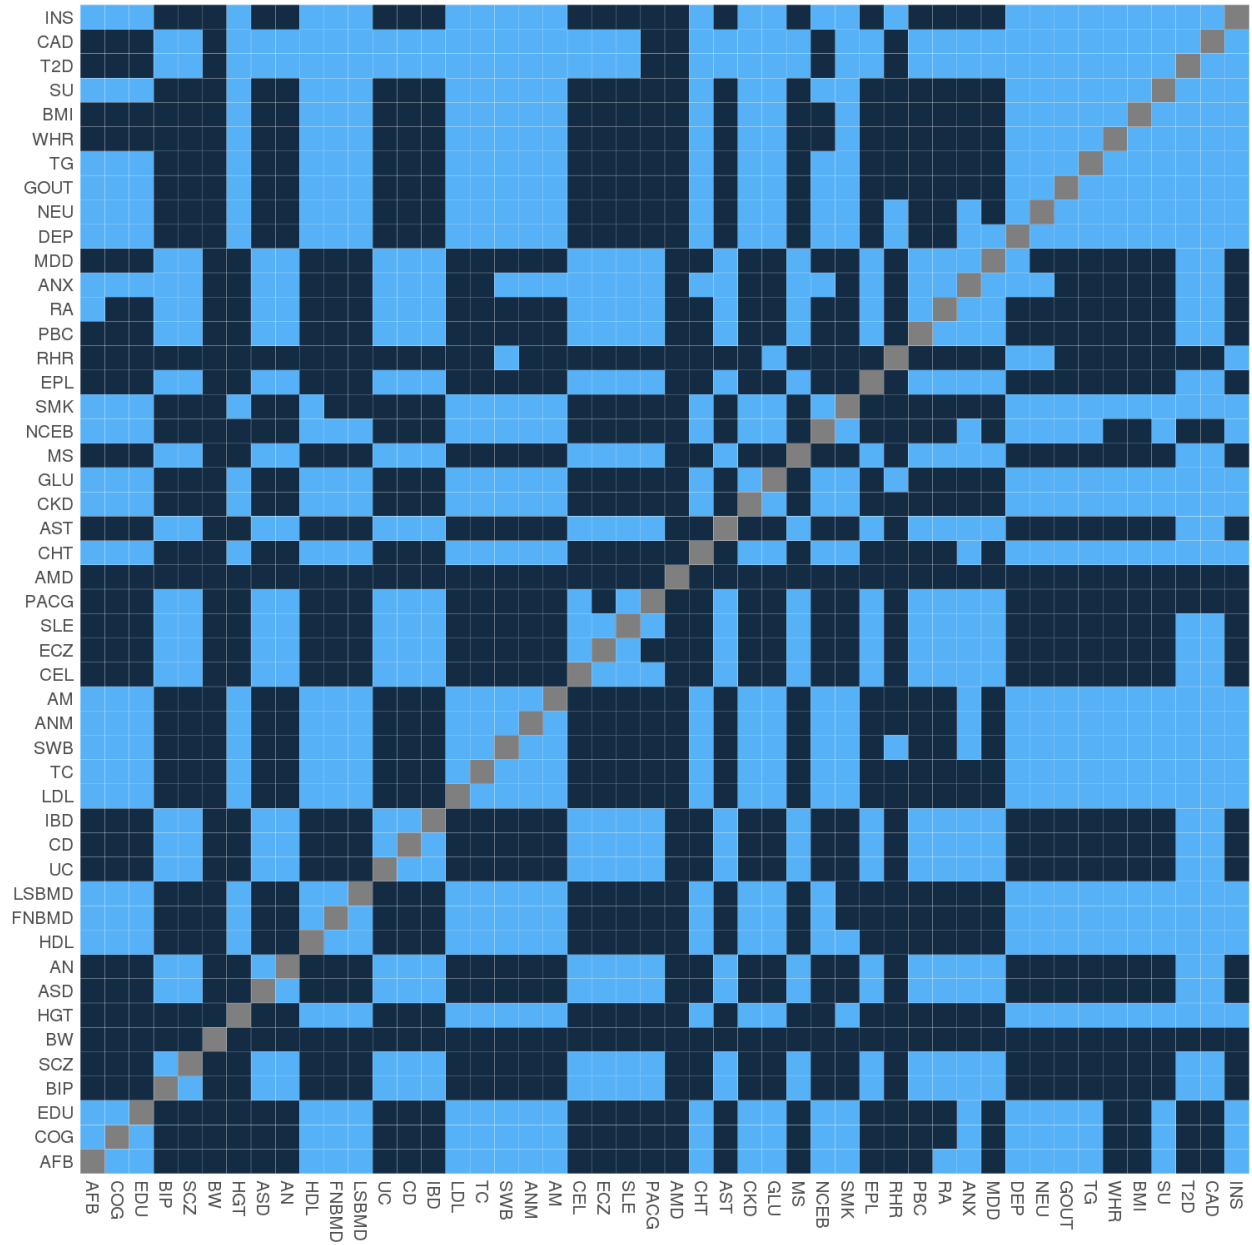

**Figure S8. Pairs of traits with sample overlap correction.** Some studies among the 48 GWASs have substantial sample overlap. Therefore, we applied sample overlap correction (See **Methods** section) when analyzing those traits throughout the paper. Those trait pairs are highlighted in light blue.

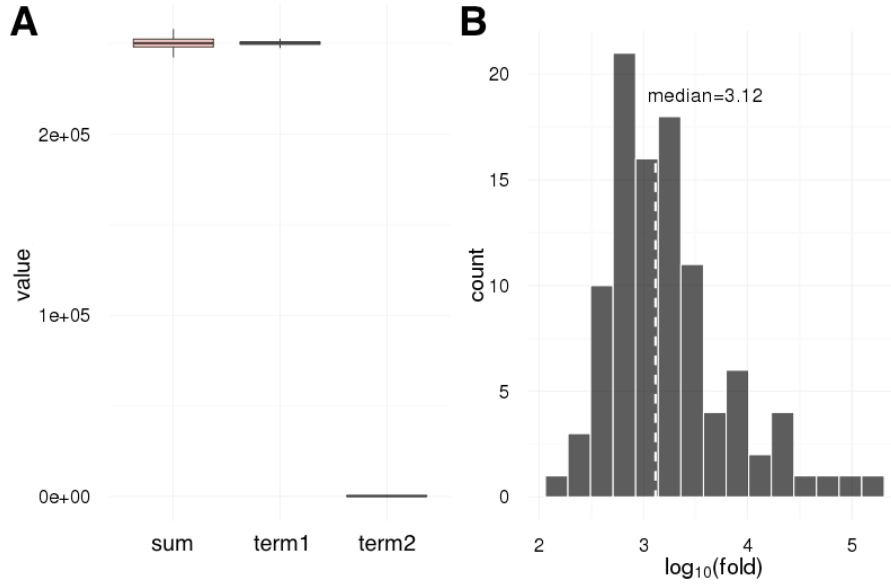

**Figure S9. Numerical justifications to the theoretical proof – numerical study 1.** Analysis details are described in **Appendix**. **(A)** Labels “term1” and “term2” denote  $tr(A^T H_1 A H_2)$  and  $tr(A^T \Theta A^T \Theta)$ , respectively; “sum” denotes the summation of both, i.e.  $tr(A^T H_1 A H_2) + tr(A^T \Theta A^T \Theta)$ . **(B)** Histogram of  $\log_{10}(|tr(A^T H_1 A H_2)/tr(A^T \Theta A^T \Theta)|)$ .

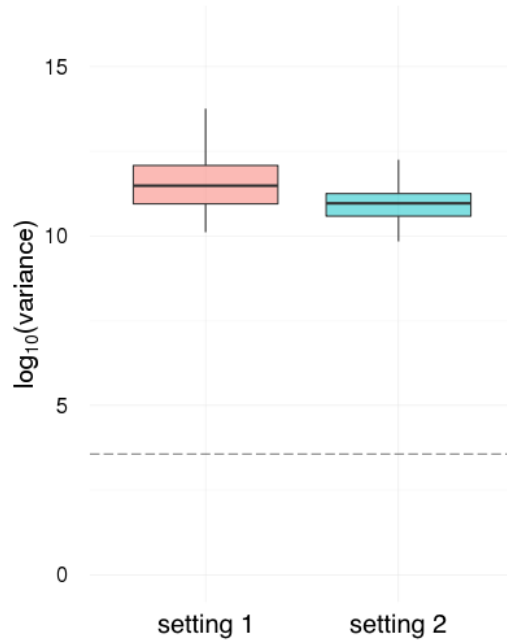

**Figure S10. Numerical justifications to the theoretical proof – numerical study 2.** Analysis details are described in **Appendix**. Boxplots under settings 1 and 2 denote the sample variance  $\widehat{Var}(y_1^T A y_2)$  and  $\widehat{Var}(y_1^T A' y_2)$ , respectively (with 100 repeats). The dotted line marks the sample variance  $\widehat{Var}(y_1^T \tilde{A} y_2)$ .

## Supplementary Tables

**Table S1. Details of 48 GWAS.**

| Trait                             | Acronym | Sample Size <sup>a</sup>     | Ref. | URL                                                                                                                                                                                           |
|-----------------------------------|---------|------------------------------|------|-----------------------------------------------------------------------------------------------------------------------------------------------------------------------------------------------|
| Age at First Birth                | AFB     | 241,781                      | 1    | <a href="http://www.thessgac.org/data">http://www.thessgac.org/data</a>                                                                                                                       |
| Age at Menarche                   | AM      | 132,989                      | 2    | <a href="http://www.reprogen.org/data_download.html">http://www.reprogen.org/data_download.html</a>                                                                                           |
| Age at Natural Menopause          | ANM     | 69,360                       | 3    | <a href="http://www.reprogen.org/data_download.html">http://www.reprogen.org/data_download.html</a>                                                                                           |
| Age-related Macular Degeneration  | AMD     | 33,976                       | 4    | <a href="http://csg.sph.umich.edu/abecasis/public/amd2015/">http://csg.sph.umich.edu/abecasis/public/amd2015/</a>                                                                             |
| Anorexia Nervosa                  | AN      | 14,477                       | 5    | <a href="https://www.med.unc.edu/pgc/downloads">https://www.med.unc.edu/pgc/downloads</a>                                                                                                     |
| Anxiety Disorder                  | ANX     | 17,310                       | 6    | <a href="https://www.med.unc.edu/pgc/downloads">https://www.med.unc.edu/pgc/downloads</a>                                                                                                     |
| Asthma                            | AST     | 26,475                       | 7    | <a href="http://www.cng.fr/gabriel/index.html">http://www.cng.fr/gabriel/index.html</a>                                                                                                       |
| Autism Spectrum Disorder          | ASD     | 10,610                       | 8    | <a href="https://www.med.unc.edu/pgc/downloads">https://www.med.unc.edu/pgc/downloads</a>                                                                                                     |
| Bipolar Disorder                  | BIP     | 16,731                       | 9    | <a href="https://www.med.unc.edu/pgc/downloads">https://www.med.unc.edu/pgc/downloads</a>                                                                                                     |
| Birth Weight                      | BW      | 143,677                      | 10   | <a href="http://egg-consortium.org/birth-weight-2016.html">http://egg-consortium.org/birth-weight-2016.html</a>                                                                               |
| Body Mass Index                   | BMI     | 234,069                      | 11   | <a href="http://www.broadinstitute.org/collaboration/giant/index.php/GIANT_consortium_data_files">http://www.broadinstitute.org/collaboration/giant/index.php/GIANT_consortium_data_files</a> |
| Celiac Disease                    | CEL     | 15,283                       | 12   | <a href="https://www.immunobase.org/downloads/protected_data/GWAS_Data/">https://www.immunobase.org/downloads/protected_data/GWAS_Data/</a>                                                   |
| Chronic Kidney Disease            | CKD     | 118,147                      | 13   | <a href="https://www.nhlbi.nih.gov/research/intramural/researchers/ckdgen">https://www.nhlbi.nih.gov/research/intramural/researchers/ckdgen</a>                                               |
| Chronotype                        | CHT     | 127,898                      | 14   | <a href="http://www.t2diabetesgenes.org/data/">http://www.t2diabetesgenes.org/data/</a>                                                                                                       |
| Cognitive Performance             | COG     | 106,736                      | 15   | <a href="http://www.thessgac.org/data">http://www.thessgac.org/data</a>                                                                                                                       |
| Coronary Artery Disease           | CAD     | 184,305                      | 16   | <a href="http://www.cardiogramplusc4d.org/downloads/">http://www.cardiogramplusc4d.org/downloads/</a>                                                                                         |
| Crohn's Disease                   | CD      | 27,726                       | 17   | <a href="http://www.ibdgenetics.org">http://www.ibdgenetics.org</a>                                                                                                                           |
| Depressive Symptoms               | DEP     | 161,460                      | 18   | <a href="http://www.thessgac.org/data">http://www.thessgac.org/data</a>                                                                                                                       |
| Eczema                            | ECZ     | 40,835                       | 19   | <a href="http://data.bris.ac.uk/data/dataset/28uchsdpmub118uex26ylacqm">http://data.bris.ac.uk/data/dataset/28uchsdpmub118uex26ylacqm</a>                                                     |
| Education Years                   | EDU     | 293,723                      | 20   | <a href="http://www.thessgac.org/data">http://www.thessgac.org/data</a>                                                                                                                       |
| Epilepsy                          | EPL     | 34,853                       | 21   | <a href="http://www.epigad.org/page/show/homepage">http://www.epigad.org/page/show/homepage</a>                                                                                               |
| Fasting Glucose                   | GLU     | 58,074                       | 22   | <a href="http://www.magicinvestigators.org/downloads/">http://www.magicinvestigators.org/downloads/</a>                                                                                       |
| Fasting Insulin                   | INS     | 51,750                       | 22   | <a href="http://www.magicinvestigators.org/downloads/">http://www.magicinvestigators.org/downloads/</a>                                                                                       |
| Femoral Neck Bone Mineral Density | FNBM    | 32,961                       | 23   | <a href="http://www.gefos.org/?q=content/data-release-2012">http://www.gefos.org/?q=content/data-release-2012</a>                                                                             |
| Gout                              | GOUT    | 69,374                       | 24   | <a href="http://metabolomics.helmholtz-muenchen.de/gugc/">http://metabolomics.helmholtz-muenchen.de/gugc/</a>                                                                                 |
| HDL Cholesterol                   | HDL     | 99,900                       | 25   | <a href="http://csg.sph.umich.edu/abecasis/public/lipids2010/">http://csg.sph.umich.edu/abecasis/public/lipids2010/</a>                                                                       |
| Height                            | HGT     | 253,288                      | 26   | <a href="http://www.broadinstitute.org/collaboration/giant/index.php/GIANT_consortium_data_files">http://www.broadinstitute.org/collaboration/giant/index.php/GIANT_consortium_data_files</a> |
| Inflammatory Bowel Disease        | IBD     | 34,694                       | 17   | <a href="http://www.ibdgenetics.org">http://www.ibdgenetics.org</a>                                                                                                                           |
| LDL Cholesterol                   | LDL     | 95,454                       | 25   | <a href="http://csg.sph.umich.edu/abecasis/public/lipids2010/">http://csg.sph.umich.edu/abecasis/public/lipids2010/</a>                                                                       |
| Lumbar Spine Bone Mineral Density | LSBMD   | 31,800                       | 23   | <a href="http://www.gefos.org/?q=content/data-release-2012">http://www.gefos.org/?q=content/data-release-2012</a>                                                                             |
| Major Depressive Disorder         | MDD     | 18,759                       | 27   | <a href="https://www.med.unc.edu/pgc/downloads">https://www.med.unc.edu/pgc/downloads</a>                                                                                                     |
| Multiple Sclerosis                | MS      | 27,148                       | 28   | <a href="https://www.immunobase.org/downloads/protected_data/GWAS_Data/">https://www.immunobase.org/downloads/protected_data/GWAS_Data/</a>                                                   |
| Neuroticism                       | NEU     | 170,911                      | 18   | <a href="http://www.thessgac.org/data">http://www.thessgac.org/data</a>                                                                                                                       |
| Number of Children Ever Born      | NCEB    | 318,463                      | 1    | <a href="http://www.thessgac.org/data">http://www.thessgac.org/data</a>                                                                                                                       |
| Primary Angle Closure Glaucoma    | PACG    | 26,454                       | 29   | Supplementary data in the original GWAS paper                                                                                                                                                 |
| Primary Biliary Cirrhosis         | PBC     | 13,239                       | 30   | <a href="https://www.immunobase.org/downloads/protected_data/GWAS_Data/">https://www.immunobase.org/downloads/protected_data/GWAS_Data/</a>                                                   |
| Resting Heart Rate                | RHR     | 134,251                      | 31   | <a href="http://www.cardiomics.net/download-data">http://www.cardiomics.net/download-data</a>                                                                                                 |
| Rheumatoid Arthritis              | RA      | 58,284                       | 32   | <a href="http://plaza.umin.ac.jp/~yokada/datasource/software.htm">http://plaza.umin.ac.jp/~yokada/datasource/software.htm</a>                                                                 |
| Schizophrenia                     | SCZ     | 82,315                       | 33   | <a href="https://www.med.unc.edu/pgc/downloads">https://www.med.unc.edu/pgc/downloads</a>                                                                                                     |
| Serum Urate                       | SU      | 110,347                      | 24   | <a href="http://metabolomics.helmholtz-muenchen.de/gugc/">http://metabolomics.helmholtz-muenchen.de/gugc/</a>                                                                                 |
| Smoking Behavior                  | SMK     | 74,053                       | 34   | <a href="https://www.med.unc.edu/pgc/downloads">https://www.med.unc.edu/pgc/downloads</a>                                                                                                     |
| Subjective Well-being             | SWB     | 298,420                      | 18   | <a href="http://www.thessgac.org/data">http://www.thessgac.org/data</a>                                                                                                                       |
| Systemic Lupus Erythematosus      | SLE     | 14,267                       | 35   | <a href="https://www.immunobase.org/downloads/protected_data/GWAS_Data/">https://www.immunobase.org/downloads/protected_data/GWAS_Data/</a>                                                   |
| Total Cholesterol                 | TC      | 100,184                      | 25   | <a href="http://csg.sph.umich.edu/abecasis/public/lipids2010/">http://csg.sph.umich.edu/abecasis/public/lipids2010/</a>                                                                       |
| Triglycerides                     | TG      | 96,598                       | 25   | <a href="http://csg.sph.umich.edu/abecasis/public/lipids2010/">http://csg.sph.umich.edu/abecasis/public/lipids2010/</a>                                                                       |
| Type-II Diabetes                  | T2D     | 69,033                       | 36   | <a href="http://diagram-consortium.org/downloads.html">http://diagram-consortium.org/downloads.html</a>                                                                                       |
| Ulcerative Colitis                | UC      | 28,738                       | 17   | <a href="http://www.ibdgenetics.org">http://www.ibdgenetics.org</a>                                                                                                                           |
| Waist Hip Ratio adjusted for BMI  | WHR     | 142,762                      | 37   | <a href="http://www.broadinstitute.org/collaboration/giant/index.php/GIANT_consortium_data_files">http://www.broadinstitute.org/collaboration/giant/index.php/GIANT_consortium_data_files</a> |
| <b>Total</b>                      |         | <b>4,563,942<sup>b</sup></b> |      |                                                                                                                                                                                               |

<sup>a</sup> Due to technical reasons, sample size may be slightly different from what is reported in the reference.

<sup>b</sup> Calculation for total sample size did not take sample overlap between studies into account.

**Table S2. Pair-wise genetic correlation of 48 complex traits.**

Uploaded as a separate file.

**Table S3. Compare genetic correlations estimated by GNOVA and LDSC.**

| Significance | Trait 1 | Trait 2 | GNOVA       |          | LDSC        |          |
|--------------|---------|---------|-------------|----------|-------------|----------|
|              |         |         | Correlation | P        | Correlation | P        |
|              | AFB     | ASD     | 0.2571      | 1.37E-06 | 0.1617      | 2.80E-03 |
|              | AFB     | EPL     | -0.2418     | 4.22E-05 | -0.1067     | 1.65E-01 |
|              | AFB     | MDD     | -0.2779     | 3.90E-09 | -0.2425     | 1.20E-03 |
|              | AFB     | RA      | -0.2347     | 5.89E-11 | -0.1799     | 2.00E-04 |
|              | AFB     | T2D     | -0.1902     | 5.60E-08 | -0.1647     | 3.00E-04 |
|              | AM      | CAD     | -0.1434     | 4.22E-06 | -0.1108     | 2.00E-04 |
|              | AM      | SU      | -0.1272     | 2.03E-06 | -0.0822     | 9.50E-03 |
|              | AN      | GLU     | -0.2545     | 8.77E-06 | -0.2959     | 8.00E-04 |
|              | AN      | HDL     | 0.2354      | 1.10E-05 | 0.2575      | 7.00E-04 |
|              | AN      | TG      | -0.2848     | 3.23E-08 | -0.2292     | 4.00E-04 |
|              | AN      | WHR     | -0.3156     | 2.78E-06 | -0.2195     | 5.83E-05 |
|              | ANM     | CEL     | 0.1669      | 5.65E-07 | 0.0736      | 3.54E-01 |
|              | ANX     | COG     | -0.3417     | 1.55E-07 | -0.4370     | 6.00E-04 |
|              | ANX     | MDD     | 0.6657      | 1.14E-09 | 0.7597      | 6.58E-05 |
|              | ANX     | SMK     | 0.3947      | 4.25E-05 | 0.3960      | 4.30E-03 |
|              | ASD     | MS      | -0.4704     | 4.13E-11 | -0.2531     | 6.61E-02 |
|              | ASD     | SWB     | -0.2304     | 4.18E-05 | -0.2648     | 6.00E-04 |
|              | AST     | ECZ     | 0.3537      | 6.71E-06 | 0.6475      | 4.98E-05 |
|              | BIP     | DEP     | 0.3620      | 1.43E-18 | 0.2163      | 9.86E-05 |
|              | BIP     | NEU     | 0.1400      | 1.55E-05 | 0.0963      | 3.97E-02 |
|              | BIP     | SWB     | -0.1773     | 2.08E-05 | -0.2174     | 9.00E-04 |
|              | BMI     | CKD     | 0.2453      | 4.76E-06 | 0.1748      | 1.80E-03 |
|              | BMI     | DEP     | 0.2136      | 6.63E-08 | 0.1220      | 9.37E-05 |
|              | BMI     | NCEB    | 0.2533      | 4.20E-11 | 0.1111      | 7.70E-05 |
| GNOVA+;      | BW      | GLU     | -0.1563     | 4.17E-05 | -0.1246     | 9.90E-03 |
| LDSC-        | BW      | TC      | -0.1400     | 1.29E-05 | -0.1269     | 1.30E-03 |
|              | CD      | MS      | 0.1943      | 3.03E-06 | 0.2097      | 1.79E-01 |
|              | CEL     | COG     | 0.1438      | 2.71E-06 | 0.2218      | 1.90E-03 |
|              | CHT     | COG     | -0.1491     | 1.03E-08 | -0.1439     | 1.30E-03 |
|              | CHT     | SCZ     | -0.1047     | 1.26E-05 | -0.1180     | 4.00E-04 |
|              | COG     | INS     | -0.1511     | 1.36E-05 | -0.2396     | 1.00E-04 |
|              | COG     | RA      | -0.1809     | 4.47E-11 | -0.1921     | 1.37E-02 |
|              | COG     | T2D     | -0.1913     | 1.31E-07 | -0.1984     | 2.00E-04 |
|              | EDU     | EPL     | -0.2099     | 4.39E-07 | -0.1883     | 1.60E-03 |
|              | EDU     | LDL     | -0.1332     | 2.98E-06 | -0.1319     | 3.00E-04 |
|              | EDU     | T2D     | -0.1738     | 1.39E-08 | -0.1359     | 1.00E-04 |
|              | FNBM    | GLU     | 0.3400      | 1.89E-05 | 0.1457      | 6.40E-03 |
|              | FNBM    | T2D     | 0.2976      | 1.31E-05 | 0.1734      | 8.00E-04 |
|              | GLU     | INS     | 0.2633      | 2.52E-05 | 0.2956      | 1.50E-03 |
|              | GLU     | RHR     | 0.1433      | 5.34E-06 | 0.1390      | 3.90E-03 |
|              | IBD     | MS      | 0.1712      | 1.29E-05 | 0.3092      | 9.07E-02 |
|              | INS     | RHR     | 0.1834      | 6.18E-06 | 0.2228      | 4.76E-05 |
|              | MDD     | SMK     | 0.2738      | 3.76E-06 | 0.2000      | 3.94E-02 |
|              | MS      | SLE     | 0.4343      | 7.13E-16 | 0.5394      | 1.29E-02 |
|              | NEU     | WHR     | 0.1907      | 6.79E-06 | 0.1222      | 3.00E-04 |
|              | PBC     | UC      | 0.2047      | 9.22E-06 | 0.2490      | 1.10E-03 |
|              | RHR     | T2D     | 0.1932      | 9.89E-07 | 0.1779      | 2.00E-04 |
|              | SCZ     | SMK     | 0.1371      | 2.84E-06 | 0.1093      | 4.60E-03 |
|              | SU      | T2D     | 0.2753      | 1.16E-17 | 0.2783      | 2.00E-04 |
|              | SU      | TG      | 0.3822      | 4.58E-09 | 0.3301      | 4.12E-05 |
|              |         | CAD     | 0.2140      | 7.01E-03 | 0.2242      | 4.40E-06 |
| GNOVA-;      | LDL     | TC      | 0.8596      | 7.69E-05 | 0.9905      | 0.00E+00 |
| LDSC+        | T2D     | WHR     | 0.2643      | 1.10E-04 | 0.2525      | 1.48E-07 |

<sup>a</sup> p-value output in LDSC log file was 0.

**Table S4. Genetic correlation between eight pairs of physiologically or epidemiologically related traits.**

| <b>Trait 1</b> | <b>Trait 2</b> | <b>Covariance</b> | <b>SE</b> | <b>Correlation</b> | <b>P</b> |
|----------------|----------------|-------------------|-----------|--------------------|----------|
| FNBMD          | LSBMD          | 0.1553            | 0.0156    | 1.7719             | 2.01E-23 |
| DEP            | MDD            | 0.0562            | 0.0058    | 0.6270             | 5.95E-22 |
| SCZ            | SWB            | -0.0309           | 0.0034    | -0.3176            | 2.50E-19 |
| ANX            | SWB            | -0.0287           | 0.0037    | -0.6927            | 5.71E-15 |
| NEU            | SWB            | -0.0299           | 0.0023    | -0.6799            | 3.60E-38 |
| DEP            | SWB            | -0.0221           | 0.0016    | -0.7139            | 3.03E-42 |
| MDD            | SWB            | -0.0516           | 0.0039    | -0.7952            | 3.58E-39 |

**Table S5. Stratify genetic covariance by genome functionality.**

Uploaded as a separate file.

**Table S6. Stratify genetic covariance by SNPs' MAF in 1000 Genomes Project.**

Uploaded as a separate file.

**Table S7. Stratify genetic covariance by tissue type.**

Uploaded as a separate file.



**Table S8. Details of LOAD and ALS GWASs.**

| <b>Trait</b>                   | <b>Sample Size</b> | <b>Ref.</b>   | <b>URL</b>                                                                                                                                              |
|--------------------------------|--------------------|---------------|---------------------------------------------------------------------------------------------------------------------------------------------------------|
| Late-onset Alzheimer's disease | 54,162             | <sup>38</sup> | <a href="http://web.pasteur-lille.fr/en/recherche/u744/igap/igap_download.php">http://web.pasteur-lille.fr/en/recherche/u744/igap/igap_download.php</a> |
| Amyotrophic lateral sclerosis  | 36,052             | <sup>39</sup> | <a href="http://databrowser.projectmine.com">http://databrowser.projectmine.com</a>                                                                     |

**Table S9. Tissue-stratified covariance estimates of LOAD and ALS.**

| <b>Tissue</b>    | <b>Covariance</b> | <b>SE</b> | <b>P</b> |
|------------------|-------------------|-----------|----------|
| Brain            | 0.0087            | 0.0081    | 0.283    |
| Cardiovascular   | 0.0087            | 0.0106    | 0.412    |
| Epithelium       | 0.0038            | 0.0126    | 0.762    |
| Gastrointestinal | 0.0001            | 0.0110    | 0.996    |
| Immune           | 0.0254            | 0.0103    | 0.014    |
| Muscle           | 0.0008            | 0.0097    | 0.938    |
| Other            | 0.0006            | 0.0139    | 0.964    |

**Table S10. Genetic correlation between LOAD, ALS, and 48 complex traits.**

| Trait | LOAD       |        |             |          | ALS        |        |             |          |
|-------|------------|--------|-------------|----------|------------|--------|-------------|----------|
|       | Covariance | SE     | Correlation | P        | Covariance | SE     | Correlation | P        |
| AFB   | -0.0095    | 0.0021 | -0.1595     | 7.07E-06 | -0.0060    | 0.0022 | -0.1003     | 6.07E-03 |
| AM    | 0.0014     | 0.0037 | 0.0129      | 7.05E-01 | 0.0070     | 0.0033 | 0.0642      | 3.42E-02 |
| AMD   | -0.0051    | 0.0065 | -0.0333     | 4.33E-01 | -0.0033    | 0.0051 | -0.0220     | 5.19E-01 |
| AN    | 0.0109*    | 0.0078 | 0.0813      | 1.61E-01 | 0.0148     | 0.0078 | 0.2981*     | 5.86E-02 |
| ANM   | -0.0031    | 0.0041 | -0.0332     | 4.49E-01 | 0.0030     | 0.0038 | 0.0314      | 4.32E-01 |
| ANX   | 0.0078*    | 0.0075 | 0.0892      | 2.98E-01 | -0.0083    | 0.0064 | -0.0444*    | 1.96E-01 |
| ASD   | 0.0019*    | 0.0089 | 0.0136      | 8.29E-01 | -0.0152    | 0.0087 | -0.0761*    | 8.18E-02 |
| AST   | 0.0250     | 0.0063 | 0.1956      | 7.97E-05 | 0.0159     | 0.0070 | 0.3405*     | 2.41E-02 |
| BIP   | 0.0079*    | 0.0073 | 0.0505      | 2.82E-01 | -0.0015    | 0.0073 | 0.2364*     | 8.42E-01 |
| BMI   | -0.0034    | 0.0030 | -0.0494     | 2.71E-01 | 0.0043     | 0.0026 | 0.0626      | 9.59E-02 |
| BW    | -0.0019    | 0.0029 | -0.0203     | 5.23E-01 | 0.0051     | 0.0029 | 0.0578      | 7.78E-02 |
| CAD   | -0.0012*   | 0.0026 | -0.0223     | 6.40E-01 | -0.0028    | 0.0023 | 0.2042*     | 2.30E-01 |
| CD    | -0.0073*   | 0.0063 | -0.0468     | 2.49E-01 | -0.0014    | 0.0058 | 0.2603*     | 8.06E-01 |
| CEL   | -0.0110*   | 0.0099 | -0.0455     | 2.68E-01 | 0.0284     | 0.0090 | 0.5444*     | 1.52E-03 |
| CHT   | 0.0046     | 0.0035 | 0.0510      | 1.91E-01 | -0.0082    | 0.0029 | -0.0916     | 5.25E-03 |
| CKD   | 0.0014     | 0.0031 | 0.0346      | 6.52E-01 | 0.0017     | 0.0026 | 0.0409      | 5.05E-01 |
| COG   | -0.0234    | 0.0034 | -0.2547     | 1.05E-11 | -0.0007    | 0.0031 | -0.0079     | 8.08E-01 |
| DEP   | 0.0027     | 0.0029 | 0.0479      | 3.56E-01 | 0.0035     | 0.0025 | 0.0644      | 1.74E-01 |
| ECZ   | 0.0117     | 0.0053 | 0.1365      | 2.79E-02 | 0.0082     | 0.0046 | 0.0994      | 7.56E-02 |
| EDU   | -0.0186    | 0.0027 | -0.1988     | 3.41E-12 | -0.0045    | 0.0024 | -0.0501     | 6.06E-02 |
| EPL   | 0.0056*    | 0.0043 | 0.0899      | 1.87E-01 | 0.0012     | 0.0042 | 0.6557*     | 7.68E-01 |
| FNBM  | 0.0093     | 0.0059 | 0.1131      | 1.17E-01 | 0.0010     | 0.0051 | 0.0117      | 8.50E-01 |
| GLU   | 0.0106     | 0.0044 | 0.1284      | 1.59E-02 | 0.0042     | 0.0041 | 0.0505      | 3.07E-01 |
| GOUT  | 0.0007     | 0.0031 | 0.0317      | 8.20E-01 | 0.0010     | 0.0030 | 0.0429      | 7.32E-01 |
| HDL   | 0.0014     | 0.0037 | 0.0189      | 7.06E-01 | -0.0025    | 0.0033 | -0.0337     | 4.38E-01 |
| HGT   | -0.0174    | 0.0044 | -0.1043     | 6.67E-05 | 0.0004     | 0.0038 | 0.0025      | 9.12E-01 |
| IBD   | -0.0113*   | 0.0057 | -0.0727     | 4.93E-02 | -0.0029    | 0.0046 | 0.3208*     | 5.20E-01 |
| INS   | 0.0014     | 0.0044 | 0.0175      | 7.56E-01 | -0.0041    | 0.0042 | -0.0530     | 3.27E-01 |
| LDL   | 0.0085     | 0.0040 | 0.1194      | 3.25E-02 | 0.0027     | 0.0032 | 0.0365      | 3.94E-01 |
| LSBMD | 0.0188     | 0.0062 | 0.2331      | 2.26E-03 | -0.0045    | 0.0050 | -0.0542     | 3.64E-01 |
| MDD   | 0.0030*    | 0.0083 | 0.0244      | 7.15E-01 | -0.0035    | 0.0069 | 0.2029*     | 6.13E-01 |
| MS    | -0.0100*   | 0.0078 | -0.0686     | 2.02E-01 | 0.0283     | 0.0081 | 0.3924*     | 4.55E-04 |
| NCEB  | 0.0013     | 0.0019 | 0.0339      | 4.89E-01 | 0.0017     | 0.0018 | 0.0412      | 3.62E-01 |
| NEU   | 0.0064     | 0.0035 | 0.0759      | 6.95E-02 | 0.0037     | 0.0036 | 0.0456      | 3.02E-01 |
| PACG  | 0.0062     | 0.0059 | 0.0443      | 2.96E-01 | 0.0141     | 0.0055 | 0.1185      | 9.67E-03 |
| PBC   | -0.0494*   | 0.0107 | -0.2354     | 4.36E-06 | 0.0030     | 0.0170 | 0.5388*     | 8.61E-01 |
| RA    | -0.0066*   | 0.0050 | -0.0652     | 1.81E-01 | -0.0196    | 0.0087 | 0.0211*     | 2.52E-02 |
| RHR   | 0.0011     | 0.0030 | 0.0101      | 7.27E-01 | 0.0054     | 0.0034 | 0.0538      | 1.10E-01 |
| SCZ   | 0.0005*    | 0.0047 | 0.0029      | 9.13E-01 | 0.0128     | 0.0048 | 0.2516*     | 7.53E-03 |
| SLE   | -0.0009*   | 0.0094 | -0.0034     | 9.24E-01 | 0.0243     | 0.0142 | 0.0738*     | 8.75E-02 |
| SMK   | -0.0007    | 0.0036 | -0.0095     | 8.46E-01 | 0.0054     | 0.0036 | 0.0720      | 1.28E-01 |
| SU    | -0.0015    | 0.0036 | -0.0154     | 6.80E-01 | -0.0050    | 0.0033 | -0.0509     | 1.27E-01 |
| SWB   | -0.0015    | 0.0021 | -0.0347     | 4.71E-01 | 0.0016     | 0.0019 | 0.0353      | 3.97E-01 |
| T2D   | -0.0002*   | 0.0041 | -0.0024     | 9.62E-01 | -0.0028    | 0.0040 | 0.2045*     | 4.82E-01 |
| TC    | 0.0095     | 0.0044 | 0.1258      | 3.12E-02 | 0.0004     | 0.0035 | 0.0050      | 9.09E-01 |
| TG    | 0.0058     | 0.0037 | 0.0788      | 1.17E-01 | -0.0027    | 0.0043 | -0.0350     | 5.27E-01 |
| UC    | -0.0148*   | 0.0054 | -0.1061     | 5.68E-03 | -0.0064    | 0.0047 | 0.3328*     | 1.75E-01 |
| WHR   | 0.0017     | 0.0025 | 0.0335      | 5.02E-01 | 0.0027     | 0.0030 | 0.0508      | 3.74E-01 |

\* Sample overlap correction was applied.

## Acknowledgements

This study was supported in part by the National Institutes of Health grants R01 GM59507, the VA Cooperative Studies Program of the Department of Veterans Affairs, Office of Research and Development, and the Yale World Scholars Program sponsored by the China Scholarship Council. Dr. Crane's and Dr. Mukherjee's efforts were supported by grant R01 AG042437 and U01 AG006781.

This study makes use of data generated by the Wellcome Trust Case-Control Consortium. A full list of the investigators who contributed to the generation of the data is available from [www.wtccc.org.uk](http://www.wtccc.org.uk). Funding for the project was provided by the Wellcome Trust under award 076113, 085475, and 090355. We thank the International Genomics of Alzheimer's Project (IGAP) for providing summary results data for these analyses. The investigators within IGAP contributed to the design and implementation of IGAP and/or provided data but did not participate in analysis or writing of this report. IGAP was made possible by the generous participation of the subjects and their families. The i-Select chips were funded by the French National Foundation on Alzheimer's disease and related disorders. EADI was supported by the LABEX (laboratory of excellence program investment for the future) DISTALZ grant, Inserm, Institut Pasteur de Lille, Université de Lille 2, and the Lille University Hospital. GERAD was supported by the Medical Research Council (Grant n° 503480), Alzheimer's Research UK (Grant n° 503176), the Wellcome Trust (Grant n° 082604/2/07/Z), and German Federal Ministry of Education and Research (BMBF): Competence Network Dementia (CND) grant n° 01GI0102, 01GI0711, 01GI0420. CHARGE was partly supported by the NIH/NIA grant R01 AG033193 and the NIA AG081220 and AGES contract N01-AG-12100, the NHLBI grant R01 HL105756, the Icelandic Heart Association, and the Erasmus Medical Center and Erasmus University. ADGC was supported by the NIH/NIA grants: U01 AG032984, U24 AG021886, U01 AG016976, and the Alzheimer's Association grant ADGC-10-196728. We are also grateful for all the consortia and investigators that provided publicly accessible GWAS summary statistics.

The authors declare no conflict of interests.

## Supplemental References

1. Barban, N., Jansen, R., de Vlaming, R., Vaez, A., Mandemakers, J.J., Tropf, F.C., Shen, X., Wilson, J.F., Chasman, D.I., and Nolte, I.M. (2016). Genome-wide analysis identifies 12 loci influencing human reproductive behavior. *Nature genetics*.
2. Perry, J.R., Day, F., Elks, C.E., Sulem, P., Thompson, D.J., Ferreira, T., He, C., Chasman, D.I., Esko, T., Thorleifsson, G., et al. (2014). Parent-of-origin-specific allelic associations among 106 genomic loci for age at menarche. *Nature* 514, 92-97.
3. Day, F.R., Ruth, K.S., Thompson, D.J., Lunetta, K.L., Pervjakova, N., Chasman, D.I., Stolk, L., Finucane, H.K., Sulem, P., Bulik-Sullivan, B., et al. (2015). Large-scale genomic analyses link reproductive aging to hypothalamic signaling, breast cancer susceptibility and BRCA1-mediated DNA repair. *Nature genetics* 47, 1294-1303.
4. Fritsche, L.G., Igl, W., Bailey, J.N.C., Grassmann, F., Sengupta, S., Bragg-Gresham, J.L., Burdon, K.P., Hebring, S.J., Wen, C., and Gorski, M. (2016). A large genome-wide association study of age-related macular degeneration highlights contributions of rare and common variants. *Nature genetics* 48, 134-143.
5. Duncan, L., Yilmaz, Z., Walters, R., Goldstein, J., Antilla, V., Bulik-Sullivan, B., Ripke, S., Adan, R., Alfredsson, L., and Ando, T. (2016). Genome-Wide Association Study Reveals First Locus for Anorexia Nervosa and Metabolic Correlations. *bioRxiv*, 088815.
6. Otowa, T., Hek, K., Lee, M., Byrne, E., Mirza, S., Nivard, M., Bigdeli, T., Aggen, S., Adkins, D., and Wolen, A. (2016). Meta-analysis of genome-wide association studies of anxiety disorders. *Molecular psychiatry*.
7. Moffatt, M.F., Gut, I.G., Demenais, F., Strachan, D.P., Bouzigon, E., Heath, S., von Mutius, E., Farrall, M., Lathrop, M., and Cookson, W.O. (2010). A large-scale, consortium-based genomewide association study of asthma. *The New England journal of medicine* 363, 1211-1221.
8. Lee, H., Ripke, S., Neale, B., Faraone, S., Purcell, S., Perlis, R., Mowry, B., Thapar, A., Goddard, M., and Witte, J. (2013). Genetic relationship between five psychiatric disorders estimated from genome-wide SNPs. *Nature genetics* 45, 984-994.
9. Sklar, P., Ripke, S., Scott, L., Andreassen, O., Cichon, S., Landén, M., Craddock, N., Edenberg, H., Nurnberger, J., and Rietschel, M. (2011). Large-scale genome-wide association analysis of bipolar disorder identifies a new susceptibility locus near ODZ4. *Nature genetics* 43, 977-U162.
10. Horikoshi, M., Beaumont, R.N., Day, F.R., Warrington, N.M., Kooijman, M.N., Fernandez-Tajes, J., Feenstra, B., van Zuydam, N.R., Gaulton, K.J., Grarup, N., et al. (2016). Genome-wide associations for birth weight and correlations with adult disease. *Nature advance online publication*.
11. Locke, A.E., Kahali, B., Berndt, S.I., Justice, A.E., Pers, T.H., Day, F.R., Powell, C., Vedantam, S., Buchkovich, M.L., and Yang, J. (2015). Genetic studies of body mass index yield new insights for obesity biology. *Nature* 518, 197-206.
12. Dubois, P.C., Trynka, G., Franke, L., Hunt, K.A., Romanos, J., Curtotti, A., Zhernakova, A., Heap, G.A., Adany, R., Aromaa, A., et al. (2010). Multiple common variants for celiac disease influencing immune gene expression. *Nature genetics* 42, 295-302.

13. Pattaro, C., Teumer, A., Gorski, M., Chu, A.Y., Li, M., Mijatovic, V., Garnaas, M., Tin, A., Sorice, R., and Li, Y. (2016). Genetic associations at 53 loci highlight cell types and biological pathways relevant for kidney function. *Nature communications* 7.
14. Jones, S.E., Tyrrell, J., Wood, A.R., Beaumont, R.N., Ruth, K.S., Tuke, M.A., Yaghootkar, H., Hu, Y., Teder-Laving, M., and Hayward, C. (2016). Genome-wide association analyses in 128,266 individuals identifies new morningness and sleep duration loci. *PLoS genetics* 12, e1006125.
15. Rietveld, C.A., Esko, T., Davies, G., Pers, T.H., Turley, P., Benyamin, B., Chabris, C.F., Emilsson, V., Johnson, A.D., and Lee, J.J. (2014). Common genetic variants associated with cognitive performance identified using the proxy-phenotype method. *Proceedings of the National Academy of Sciences* 111, 13790-13794.
16. Nikpay, M., Goel, A., Won, H.-H., Hall, L.M., Willenborg, C., Kanoni, S., Saleheen, D., Kyriakou, T., Nelson, C.P., and Hopewell, J.C. (2015). A comprehensive 1000 Genomes-based genome-wide association meta-analysis of coronary artery disease. *Nature genetics* 47, 1121.
17. Liu, J.Z., van Sommeren, S., Huang, H., Ng, S.C., Alberts, R., Takahashi, A., Ripke, S., Lee, J.C., Jostins, L., and Shah, T. (2015). Association analyses identify 38 susceptibility loci for inflammatory bowel disease and highlight shared genetic risk across populations. *Nature genetics* 47, 979-986.
18. Okbay, A., Baselmans, B.M., De Neve, J.-E., Turley, P., Nivard, M.G., Fontana, M.A., Meddens, S.F.W., Linnér, R.K., Rietveld, C.A., and Derringer, J. (2016). Genetic variants associated with subjective well-being, depressive symptoms, and neuroticism identified through genome-wide analyses. *Nature genetics*.
19. Paternoster, L., Standl, M., Waage, J., Baurecht, H., Hotze, M., Strachan, D.P., Curtin, J.A., Bonnelykke, K., Tian, C., Takahashi, A., et al. (2015). Multi-ancestry genome-wide association study of 21,000 cases and 95,000 controls identifies new risk loci for atopic dermatitis. *Nature genetics* 47, 1449-1456.
20. Okbay, A., Beauchamp, J.P., Fontana, M.A., Lee, J.J., Pers, T.H., Rietveld, C.A., Turley, P., Chen, G.B., Emilsson, V., Meddens, S.F., et al. (2016). Genome-wide association study identifies 74 loci associated with educational attainment. *Nature* 533, 539-542.
21. Consortium, T.I.L.A.E. (2014). Genetic determinants of common epilepsies: a meta-analysis of genome-wide association studies. *The Lancet Neurology* 13, 893.
22. Manning, A.K., Hivert, M.-F., Scott, R.A., Grimsby, J.L., Bouatia-Naji, N., Chen, H., Rybin, D., Liu, C.-T., Bielak, L.F., and Prokopenko, I. (2012). A genome-wide approach accounting for body mass index identifies genetic variants influencing fasting glycemic traits and insulin resistance. *Nature genetics* 44, 659-669.
23. Estrada, K., Styrkarsdottir, U., Evangelou, E., Hsu, Y.-H., Duncan, E.L., Ntzani, E.E., Oei, L., Albagha, O.M., Amin, N., and Kemp, J.P. (2012). Genome-wide meta-analysis identifies 56 bone mineral density loci and reveals 14 loci associated with risk of fracture. *Nature genetics* 44, 491-501.
24. Köttgen, A., Albrecht, E., Teumer, A., Vitart, V., Krumsiek, J., Hundertmark, C., Pistis, G., Ruggiero, D., O'Seaghdha, C.M., and Haller, T. (2013). Genome-wide association analyses identify 18 new loci associated with serum urate concentrations. *Nature genetics* 45, 145-154.

25. Teslovich, T.M., Musunuru, K., Smith, A.V., Edmondson, A.C., Stylianou, I.M., Koseki, M., Pirruccello, J.P., Ripatti, S., Chasman, D.I., and Willer, C.J. (2010). Biological, clinical and population relevance of 95 loci for blood lipids. *Nature* 466, 707-713.
26. Wood, A.R., Esko, T., Yang, J., Vedantam, S., Pers, T.H., Gustafsson, S., Chu, A.Y., Estrada, K., Luan, J., Kutalik, Z., et al. (2014). Defining the role of common variation in the genomic and biological architecture of adult human height. *Nature genetics* 46, 1173-1186.
27. Ripke, S., Wray, N.R., Lewis, C.M., Hamilton, S.P., Weissman, M.M., Breen, G., Byrne, E.M., Blackwood, D.H., Boomsma, D.I., Cichon, S., et al. (2013). A mega-analysis of genome-wide association studies for major depressive disorder. *Molecular psychiatry* 18, 497-511.
28. Sawcer, S., Hellenthal, G., Pirinen, M., Spencer, C.C., Patsopoulos, N.A., Moutsianas, L., Dilthey, A., Su, Z., Freeman, C., Hunt, S.E., et al. (2011). Genetic risk and a primary role for cell-mediated immune mechanisms in multiple sclerosis. *Nature* 476, 214-219.
29. Khor, C.C., Do, T., Jia, H., Nakano, M., George, R., Abu-Amero, K., Duvesh, R., Chen, L.J., Li, Z., and Nongpiur, M.E. (2016). Genome-wide association study identifies five new susceptibility loci for primary angle closure glaucoma. *Nature genetics* 48, 556-562.
30. Cordell, H.J., Han, Y., Mells, G.F., Li, Y., Hirschfield, G.M., Greene, C.S., Xie, G., Juran, B.D., Zhu, D., Qian, D.C., et al. (2015). International genome-wide meta-analysis identifies new primary biliary cirrhosis risk loci and targetable pathogenic pathways. *Nat Commun* 6, 8019.
31. Eppinga, R.N., Hagemeyer, Y., Burgess, S., Hinds, D.A., Stefansson, K., Gudbjartsson, D.F., van Veldhuisen, D.J., Munroe, P.B., Verweij, N., and van der Harst, P. (2016). Identification of genomic loci associated with resting heart rate and shared genetic predictors with all-cause mortality. *Nature genetics* 48, 1557-1563.
32. Okada, Y., Wu, D., Trynka, G., Raj, T., Terao, C., Ikari, K., Kochi, Y., Ohmura, K., Suzuki, A., Yoshida, S., et al. (2014). Genetics of rheumatoid arthritis contributes to biology and drug discovery. *Nature* 506, 376-381.
33. Ripke, S., Neale, B.M., Corvin, A., Walters, J.T., Farh, K.-H., Holmans, P.A., Lee, P., Bulik-Sullivan, B., Collier, D.A., and Huang, H. (2014). Biological insights from 108 schizophrenia-associated genetic loci. *Nature* 511, 421.
34. Furberg, H., Kim, Y., Dackor, J., Boerwinkle, E., Franceschini, N., Ardissino, D., Bernardinelli, L., Mannucci, P., Mauri, F., and Merlini, P. (2010). Genome-wide meta-analyses identify multiple loci associated with smoking behavior. *Nature genetics* 42, 441-447.
35. Bentham, J., Morris, D.L., Graham, D.S.C., Pinder, C.L., Tomblason, P., Behrens, T.W., Martín, J., Fairfax, B.P., Knight, J.C., and Chen, L. (2015). Genetic association analyses implicate aberrant regulation of innate and adaptive immunity genes in the pathogenesis of systemic lupus erythematosus. *Nature genetics*.
36. Mahajan, A., Go, M.J., Zhang, W., Below, J.E., Gaulton, K.J., Ferreira, T., Horikoshi, M., Johnson, A.D., Ng, M.C., and Prokopenko, I. (2014). Genome-wide trans-ancestry meta-analysis provides insight into the genetic architecture of type 2 diabetes susceptibility. *Nature genetics* 46, 234-244.

37. Shungin, D., Winkler, T.W., Croteau-Chonka, D.C., Ferreira, T., Locke, A.E., Magi, R., Strawbridge, R.J., Pers, T.H., Fischer, K., Justice, A.E., et al. (2015). New genetic loci link adipose and insulin biology to body fat distribution. *Nature* 518, 187-196.
38. Lambert, J.-C., Ibrahim-Verbaas, C.A., Harold, D., Naj, A.C., Sims, R., Bellenguez, C., Jun, G., DeStefano, A.L., Bis, J.C., and Beecham, G.W. (2013). Meta-analysis of 74,046 individuals identifies 11 new susceptibility loci for Alzheimer's disease. *Nature genetics* 45, 1452-1458.
39. van Rheenen, W., Shatunov, A., Dekker, A.M., McLaughlin, R.L., Diekstra, F.P., Pulit, S.L., van der Spek, R.A., Vösa, U., de Jong, S., and Robinson, M.R. (2016). Genome-wide association analyses identify new risk variants and the genetic architecture of amyotrophic lateral sclerosis. *Nature genetics* 48, 1043-1048.
