# Supplementary material
Source: PubMed Central journal article supplement (PMC5812911)
Supplement: mmc6.pdf [file mmc6.pdf]

**The American Journal of Human Genetics, Volume 101**

**Supplemental Data**

**A Powerful Approach to Estimating  
Annotation-Stratified Genetic Covariance  
via GWAS Summary Statistics**

**Qiongshi Lu, Boyang Li, Derek Ou, Margret Erlendsdottir, Ryan L. Powles, Tony Jiang, Yiming Hu, David Chang, Chentian Jin, Wei Dai, Qidu He, Zefeng Liu, Shubhabrata Mukherjee, Paul K. Crane, and Hongyu Zhao**
